# Supplementary material for: Strong Biomimetic Immobilization of Pt-Particle Catalyst on ABS Substrate Using Polydopamine and Its Application for Contact-Lens Cleaning with H2O2
Source: MDPI journal article supplement (doi:10.3390/nano10010114), 2020-01-07
Supplement: s1 [file s1]

## Supplementary Materials

### **Strong biomimetic immobilization of Pt-particle catalyst on ABS substrate using polydopamine and its application for contact-lens cleaning with H<sub>2</sub>O<sub>2</sub>**

Yuji Ohkubo <sup>1,\*</sup>, Tomonori Aoki <sup>1</sup>, Daisuke Kaibara <sup>1</sup>, Satoshi Seino <sup>1</sup>,  
Osamu Mori <sup>2</sup>, Rie Sasaki <sup>2</sup>, Katsuyoshi Endo <sup>1</sup> and Kazuya Yamamura <sup>1</sup>

<sup>1</sup> Graduate School of Engineering, Osaka University, 2-1 Yamadaoka, Suita, Osaka 565-0871, Japan  
[Tel and Fax: +81-6-6879-7294, and E-mail: okubo@upst.eng.osaka-u.ac.jp]

<sup>2</sup> Menicon Co., Ltd, 5-1-10 Takamori-dai, Kasugai, Aichi 487-0032, Japan

#### **Contents**

- XPS spectra of the ABS surface before and after plasma treatment ..... Figure S1
- Result of XPS analysis of the glass surface before and after PDA coating .... Figure S2
- Calibration curve for calculating the amounts of Pt on Pt/ABS samples ..... Figure S3
- Calibration curve for calculating the H<sub>2</sub>O<sub>2</sub> concentration ..... Figure S4

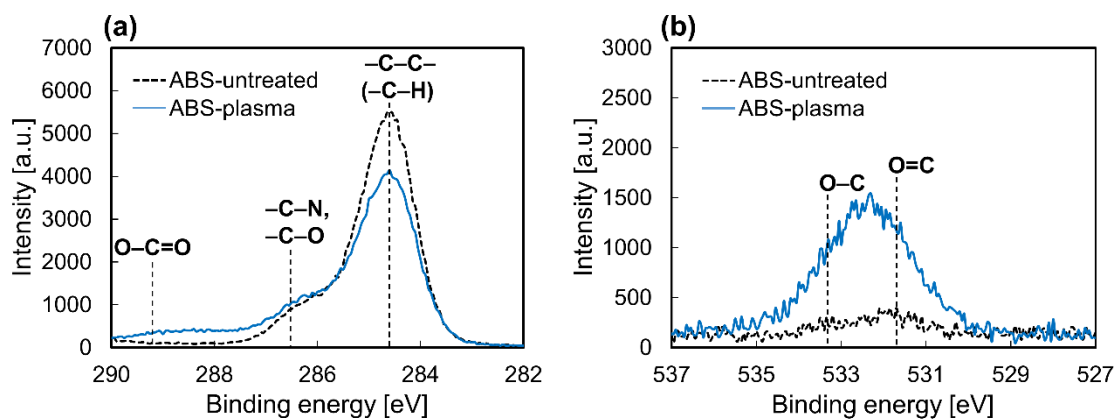

**Figure S1.** X-ray photoelectron spectroscopy (XPS) spectra of the acrylonitrile–butadiene–styrene copolymer (ABS) surface before and after the plasma treatment: (a) C1s-XPS and (b) O1s-XPS. A helium plasma treatment was applied to the ABS substrate at 100 W and 100 Pa for 60 s. In the case of the C1s-XPS spectra, the intensities of the peaks assigned to  $\text{-O-C=O}$  (at 289.2 eV) and  $\text{-C-O}$  (at 286.5 eV) increased as a result of the plasma treatment. In the case of the O1s-XPS spectra, the intensities of the peaks assigned to  $\text{O-C}$  (at 533.3 eV) and  $\text{O=C}$  (at 531.7 eV) also increased as a result of the plasma treatment. Thus, it was confirmed that oxygen-containing functional groups were generated during the process.

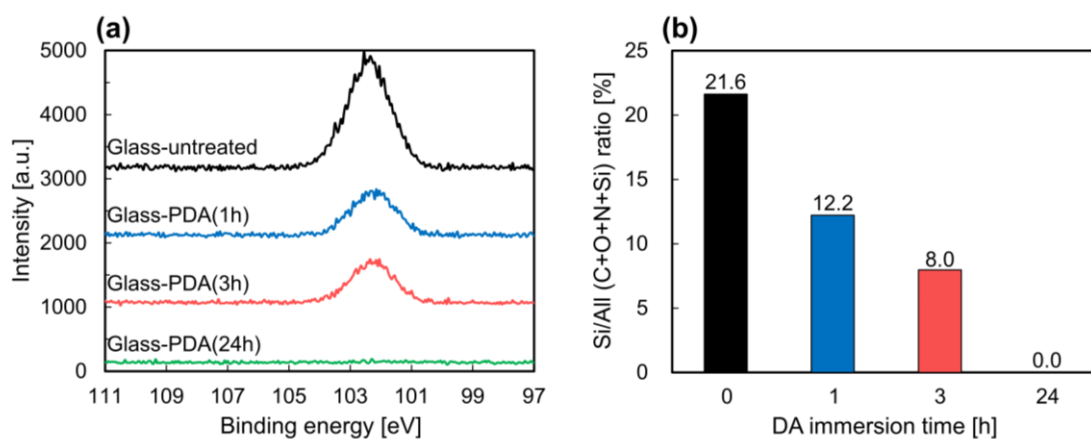

**Figure S2.** Results of X-ray photoelectron spectroscopy (XPS) analysis of the glass surface before and after PDA coating at different immersion times in a dopamine (DA) solution: **(a)** Si2p-XPS spectra and **(b)** Si/All (C+O+N+Si) ratio. The Si ratio decreased with increasing immersion time in the DA solution. Finally, the Si ratio became 0% when the glass substrate was immersed in the DA solution for 24 h. This result indicates that the glass substrate was uniformly coated with a PDA film (>5 nm in thickness) when it was immersed in the DA solution for 24 h.

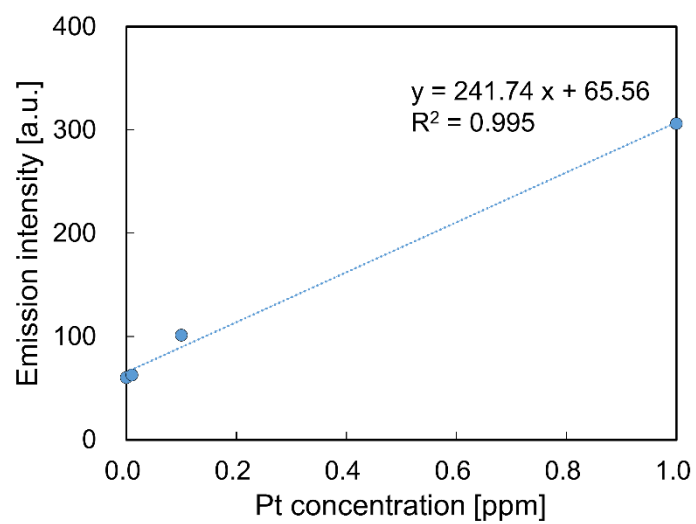

**Figure S3.** Calibration curve for calculating the amounts of Pt on the Pt/ABS samples: relation between Pt concentration and emission intensity.

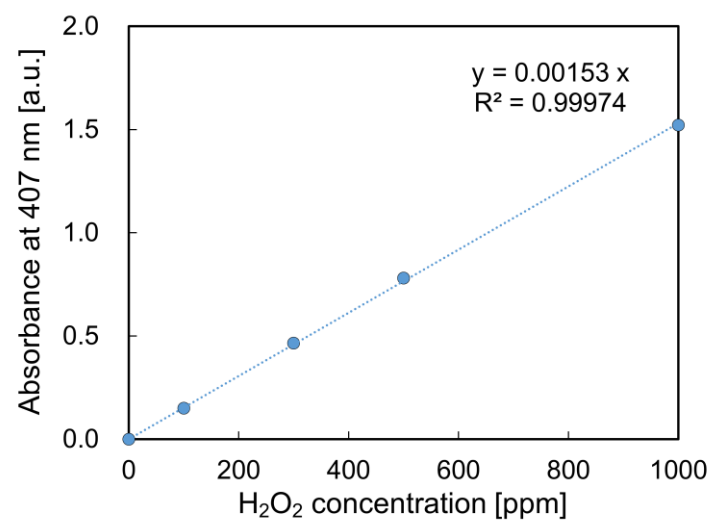

**Figure S4.** Calibration curve for calculating the H<sub>2</sub>O<sub>2</sub> concentration: relation between H<sub>2</sub>O<sub>2</sub> concentration and absorbance at 407 nm.
